## 1 **BMI-related Genetic Factors and COPD Imaging Phenotypes**

2 Authors: Jingzhou Zhang<sup>1,2</sup>, Matthew Moll<sup>2,3,4</sup>, Catherine L. Debban<sup>5</sup>, Brian D. Hobbs<sup>2,3</sup>, Heena  
3 Rijhwani<sup>2</sup>, George R. Washko<sup>3</sup>, Bartolome R. Celli<sup>3</sup>, Edwin K. Silverman<sup>2,3</sup>, Per Bakke<sup>6</sup>,  
4 Elizabeth C. Oelsner<sup>7</sup>, R. Graham Barr<sup>7</sup>, Alvar Agustí<sup>8,9</sup>, Rosa Faner<sup>10</sup>, Guy G. Bruselle<sup>11</sup>,  
5 Stephen M. Humphries<sup>12</sup>, David A. Lynch<sup>12</sup>, Josée Dupuis<sup>13,14</sup>, Ani W. Manichaikul<sup>5</sup>, George T.  
6 O'Connor<sup>1,15,#</sup>, Michael H. Cho<sup>2,3,#</sup>

7 Affiliations: <sup>1</sup>The Pulmonary Center, Department of Medicine, Boston University School of  
8 Medicine, Boston, MA; <sup>2</sup>Channing Division of Network Medicine, and <sup>3</sup>Division of Pulmonary  
9 and Critical Care Medicine, Department of Medicine, Brigham and Women's Hospital and  
10 Harvard Medical School, Boston, MA; <sup>4</sup>Division of Pulmonary, Critical Care, Sleep, and  
11 Allergy, VA Boston Healthcare System, West Roxbury, MA; <sup>5</sup>Center for Public Health  
12 Genomics, University of Virginia, Charlottesville, VA; <sup>6</sup>Department of Clinical Science,  
13 University of Bergen, Bergen, Norway; <sup>7</sup>Department of Medicine, Columbia University Medical  
14 Center, New York, NY; <sup>8</sup>Respiratory Institute, Hospital Clinic, University of Barcelona,  
15 Barcelona, and <sup>9</sup>FRC-IDIBAPS, CIBERES, Spain; <sup>10</sup>Department of Biomedical Sciences,  
16 University of Barcelona, Barcelona, Spain; <sup>11</sup>Department of Respiratory Medicine, Ghent  
17 University Hospital, Ghent, Belgium; <sup>12</sup>Department of Radiology, National Jewish Health,  
18 Denver, CO; <sup>13</sup>Department of Biostatistics, Boston University School of Public Health, Boston,  
19 MA; <sup>14</sup>Department of Epidemiology, Biostatistics and Occupational Health, McGill University,  
20 Montreal, Canada; <sup>15</sup>The NHLBI Framingham Heart Study, Framingham, MA; #Contributed  
21 equally as senior authors.

22  
23 Corresponding author:  
24 Michael H. Cho, MD, MPH  
25 181 Longwood Ave, Boston, MA 02115  
26 remhc@channing.harvard.edu

27 **Abstract**

28 **Background:** While low body mass index (BMI) is associated with emphysema and obesity is  
29 associated with airway disease in chronic obstructive pulmonary disease (COPD), the underlying  
30 mechanisms are unclear.

31 **Methods:** We aggregated genetic variants from population-based genome-wide association  
32 studies to generate a polygenic score of BMI ( $PGS_{BMI}$ ). We calculated this score for participants  
33 from COPD-enriched and community-based cohorts and examined associations with automated  
34 quantification and visual interpretation of computed tomographic emphysema and airway wall  
35 thickness (AWT). We summarized the results using meta-analysis.

36 **Results:** In the random-effects meta-analyses combining results of all cohorts ( $n=16,349$ ), a  
37 standard deviation increase of the  $PGS_{BMI}$  was associated with less emphysema as quantified by  
38 log-transformed percent of low attenuation areas  $\leq 950$  Hounsfield units ( $\beta = -0.062, p < 0.0001$ )  
39 and 15<sup>th</sup> percentile value of lung density histogram ( $\beta = 2.27, p < 0.0001$ ), and increased AWT as  
40 quantified by the square root of wall area of a 10-mm lumen perimeter airway ( $\beta = 0.016,$   
41  $p = 0.0006$ ) and mean segmental bronchial wall area percent ( $\beta = 0.26, p = 0.0013$ ). For imaging  
42 characteristics assessed by visual interpretation, a higher  $PGS_{BMI}$  was associated with reduced  
43 emphysema in both COPD-enriched cohorts (OR for a higher severity grade = 0.89,  $p = 0.0080$ )  
44 and in the community-based Framingham Heart Study (OR for the presence of  
45 emphysema = 0.82,  $p = 0.0034$ ), and a higher risk of airway wall thickening in the COPDGene  
46 study (OR = 1.17,  $p = 0.0023$ ).

47 **Conclusions:** In individuals with and without COPD, a higher body mass index polygenic risk is  
48 associated with both quantitative and visual decreased emphysema and increased AWT,  
49 suggesting genetic determinants of BMI affect both emphysema and airway wall thickening.

## 50 **Introduction**

51 Chronic obstructive pulmonary disease (COPD) is a heterogeneous condition, with emphysema  
52 and airway disease recognized as associated clinical phenotypes. In data-driven clustering studies  
53 of COPD phenotypes, emphysema- and airway-predominant disease axes and subtypes have  
54 been identified.<sup>1,2</sup> On chest computed tomography (CT), emphysema is characterized by low  
55 attenuation areas and airway disease is associated with airway wall thickening. CT-based  
56 emphysema and airway wall thickness (AWT) measures are associated with airflow obstruction  
57 and mortality in people with and without COPD.<sup>3-5</sup>

58         Body mass index (BMI) varies greatly in people with COPD. Individuals with  
59 predominant emphysema often have lower BMI compared to those with predominant airway  
60 disease. This phenomenon was observed decades ago when the terms “pink puffer” and “blue  
61 bloater” were used to describe people with stereotypical emphysema and chronic bronchitis  
62 phenotypes, respectively.<sup>6</sup> Using quantitative CT measures, lower BMI is associated with  
63 emphysema and higher fat mass is associated with higher AWT in individuals with COPD.<sup>7,8</sup>  
64 However, the mechanisms underlying these observed associations are unclear.

65         Genetic variants are assigned at birth and thus less susceptible to later life confounding  
66 factors, offer an opportunity to identify causal disease mechanisms. Genetic factors strongly  
67 influence BMI, with an estimated heritability of 30-40% with common genetic variants  
68 explaining more than half of the heritability.<sup>9</sup> Genome-wide association studies (GWAS) have  
69 identified hundreds of common genetic variants associated with BMI.<sup>10</sup> The common variants  
70 most strongly associated with BMI, fat mass, and obesity are at the *FTO* (fat mass and obesity-  
71 associated) gene locus, both in general population samples and in patients with COPD.<sup>11</sup>  
72 However, for complex traits such as BMI, the effect of an individual genetic variant tends to be

73 small. A polygenic score (PGS) aggregating the effects of numerous variants across the entire  
74 genome can increase the power to detect genetic effects and clarify causal relationships.<sup>12</sup>

75 We hypothesized that genetic variants associated with higher BMI are associated with  
76 decreased emphysema and increased AWT. As emphysema and airway disease can precede the  
77 development of airflow obstruction and are associated with clinical outcomes in individuals with  
78 and without COPD,<sup>3-5</sup> we tested our hypotheses among participants from COPD-enriched and  
79 community-based cohorts.

80

## 81 **Methods**

### 82 Study cohorts

83 We included participants who had available genotyping and chest CT data from the Genetic  
84 Epidemiology of COPD (COPDGene),<sup>13</sup> the Evaluation of COPD Longitudinally to Identify  
85 Predictive Surrogate Endpoints (ECLIPSE),<sup>14</sup> the National Emphysema Treatment Trial  
86 (NETT),<sup>15</sup> the Genetics of Chronic Obstructive Lung Disease (GenKOLS),<sup>16</sup> the Framingham  
87 Heart (FHS),<sup>17,18</sup> and the Multi-Ethnic Study of Atherosclerosis (MESA) Lung studies,<sup>19</sup> which  
88 have been previously described. The COPDGene, ECLIPSE, NETT, and GenKOLS enrolled  
89 participants with a smoking history and were enriched with COPD. In contrast, the FHS and  
90 MESA recruited community-dwelling participants without regard to a history of smoking or  
91 COPD. The COPDGene (non-Hispanic white, NHW, and African American, AA participants)  
92 and MESA (NHW, AA, Chinese, and Hispanic participants) were multi-ancestry studies, and the  
93 rest of the cohorts included predominantly NHW participants. Each study was approved by the  
94 Institutional Review Boards at participating institutions, and all participants provided written  
95 informed consent. Further details of study cohorts can be found in the Supplementary Methods.

96 *Polygenic score of BMI*

97 To obtain a summative measure of genetic variants associated with BMI, we developed a  
98 polygenic score of BMI (PGS<sub>BMI</sub>) based on the GIANT Consortium and UK biobank BMI  
99 GWAS meta-analysis summary statistics (~700,000 predominantly general population  
100 participants of European ancestry) using elastic net-based regression (lassosum v0.4.5).<sup>10</sup> The  
101 details of the development of the PGS<sub>BMI</sub> have been previously described.<sup>20</sup> We calculated a  
102 PGS<sub>BMI</sub> for each study participant as a weighted sum of variant effects using the lassosum-  
103 generated weights and the dosage of the BMI-increasing allele at each variant. We estimated the  
104 phenotypic variance explained by the PGS<sub>BMI</sub> within each cohort using the R-squared method,  
105 and a randomly selected sample of unrelated participants was used for this estimation in FHS.

106 *Emphysema and airway wall thickness measures*

107 We included quantitative and visual (qualitative) measures of emphysema and airway wall  
108 thickness (AWT) assessed on inspiratory CT. Based on CT radiodensity (in Hounsfield unit  
109 [HU]), emphysema was quantitatively evaluated using percent of low attenuation area  $\leq -950$  HU  
110 (%LAA-950), HU value at the 15th percentile of lung attenuation histogram (perc15), and lung  
111 volume-adjusted lung density (ALD).<sup>21</sup> Based on visual assessment, the severity of overall,  
112 centrilobular, and paraseptal emphysema were qualitatively graded into ordinal categories.<sup>22</sup> We  
113 estimated the longitudinal change in ALD using the average annual difference in ALD between  
114 the 5-year follow-up and baseline visits in COPDGene. AWT was quantitatively measured using  
115 the square root of wall area of a theoretical airway with a 10-mm lumen perimeter (Pi10, in mm)  
116 and the mean wall area percent of the segmental (WAP-seg) and subsegmental (WAP-subseg)  
117 bronchi,<sup>23</sup> and qualitatively evaluated as the presence of airway wall thickening based on visual  
118 assessment.<sup>24</sup> In addition to individual emphysema and AWT measures, we also included

119 previously identified emphysema and airway disease axes and COPD imaging subtypes in  
120 COPDGene.<sup>2,25</sup> Additional details about the imaging outcomes can be found in the  
121 Supplementary Methods.

122 *PGS<sub>BMI</sub> association analyses*

123 We standardized the PGS<sub>BMI</sub> to a mean of 0 and a standard deviation (SD) of 1 within each  
124 cohort. As a result, the effect estimates for the PGS<sub>BMI</sub> were at the scale of per one SD increase  
125 of the PGS<sub>BMI</sub> in the association analyses. The %LAA-950 was natural log transformed to  
126 account for skewness. We determined five primary outcomes including log-transformed %LAA-  
127 950 (log-%LAA-950), perc15, visual emphysema severity, Pi10, and WAP-seg which were  
128 available among most cohorts. We tested associations between the PGS<sub>BMI</sub> and emphysema and  
129 AWT outcomes using multivariable linear, binary logistic, ordinal logistic (for visual  
130 emphysema severity), and multinomial logistic (for COPD imaging subtypes) regressions as  
131 appropriate for outcomes. All models were adjusted for age, sex, current smoking status, pack-  
132 years of smoking, CT scanner, and principal components of genetic ancestry. AWT outcomes  
133 were additionally adjusted for height to account for body size.<sup>26</sup> To assess whether BMI-related  
134 variation in inspiration at the CT scanning substantially influenced the association between  
135 PGS<sub>BMI</sub> and AWT outcomes, we conducted sensitivity analysis further adjusting for CT total  
136 lung capacity (available in COPDGene, GenKOLS, and FHS). Longitudinal change in ALD was  
137 further adjusted for baseline ALD and current smoking status at the follow-up visit. Family  
138 relatedness in FHS was accounted for using a kinship matrix. We performed inverse variance-  
139 weighted (IVW) random-effects meta-analyses to combine effect estimates among cohorts. For  
140 the association analyses between the PGS<sub>BMI</sub> and the primary outcomes, we used a Bonferroni-

141 corrected p-value ( $p < 0.05/5$ ) to determine statistical significance. The rest of the analyses were  
142 considered exploratory and a p-value  $< 0.05$  was used.

### 143 Mendelian randomization analyses

144 We performed two-sample Mendelian randomization (MR) analyses with the “TwoSampleMR”  
145 R package to determine the effect of BMI (per SD increase) on quantitative imaging outcomes  
146 based on previous GWASs.<sup>10,26</sup> We used variants strongly associated with BMI ( $p < 5 \times 10^{-8}$ ) and  
147 applied stringent LD clumping ( $r^2 < 0.0001$ , 10000kb window). We used the IVW method as the  
148 primary analysis and performed sensitivity analyses using the weighted median and MR-Egger  
149 methods for significant IVW estimates. We assessed heterogeneity using Cochran’s Q statistic  
150 and assessed directional horizontal pleiotropy using the Egger intercept.

151

## 152 **Results**

### 153 Baseline characteristics

154 We included a total of 16,349 participants from COPD-enriched and community-based cohorts  
155 (Table 1). The community-based cohorts had an approximately even proportion of male and  
156 female participants, whereas the COPD-enriched cohorts had more males than females. There  
157 were substantial differences in smoking history and lung function among cohorts. The  
158 distribution of visual emphysema severity among cohorts (Table S1-S6), and visual airway wall  
159 thickening in COPDGene (Table S7) are shown in the Supplementary Results.

### 160 Performance of the PGS<sub>BMI</sub>

161 The polygenic score of BMI (PGS<sub>BMI</sub>) was significantly associated with measured BMI in all  
162 cohorts (Table 2). However, the variance in BMI explained by the PGS<sub>BMI</sub> differed substantially  
163 among cohorts, and in general, did not perform as well in the AA cohorts as in the NHW cohorts.

164 Within MESA, the PGS<sub>BMI</sub> had similar performance explaining BMI variation in the NHW,  
165 Chinese, and Hispanic participants.

166 Associations between PGS<sub>BMI</sub> and primary outcomes

167 In the random-effects meta-analysis of results across all cohorts (Figure 1), a standard deviation  
168 increase of the PGS<sub>BMI</sub> was associated with decreased emphysema as indicated by a lower  
169 log-%LAA-950 ( $\beta = -0.062$ ,  $p = 7.6 \times 10^{-16}$ ) and a higher perc15 ( $\beta = 2.27$ ,  $p = 5.6 \times 10^{-8}$ ), and  
170 increased AWT as indicated by a higher Pi10 ( $\beta = 0.016$ ,  $p = 6.3 \times 10^{-4}$ ) and WAP-seg ( $\beta = 0.26$ ,  
171  $p = 0.0013$ ). In the meta-analysis of the COPD-enriched cohorts, a higher PGS<sub>BMI</sub> was associated  
172 with a decreased risk of having a worse visual emphysema severity category (OR=0.89,  
173  $p = 0.0080$ ). Consistent with this finding, in FHS participants, a higher PGS<sub>BMI</sub> was associated  
174 with a lower risk for the presence (versus none) of visual emphysema (OR=0.82,  $p = 0.0034$ ). The  
175 results of the association between the PGS<sub>BMI</sub> and AWT measures were similar after adjusting  
176 for CT lung volume in cohorts with this variable acquired (data not shown). We observed  
177 significant heterogeneity in the effect estimates among cohorts for the emphysema and AWT  
178 outcomes.

179 Associations between PGS<sub>BMI</sub> and secondary outcomes

180 In the meta-analysis of results of COPDGene NHW and AA participants (Figure S1), a higher  
181 PGS<sub>BMI</sub> was associated with a decreased risk of having a worse severity category of visual  
182 centrilobular (OR=0.91,  $p = 1.2 \times 10^{-4}$ ) and paraseptal (OR=0.91,  $p = 3.4 \times 10^{-4}$ ) emphysema, and an  
183 increased risk for the presence of visual airway wall thickening (OR=1.17,  $p = 0.0023$ ). In FHS  
184 participants, a higher PGS<sub>BMI</sub> was associated with a lower risk for the presence of visual  
185 centrilobular (OR=0.81,  $p = 0.048$ ) and paraseptal (OR=0.83,  $p = 0.032$ ) emphysema. In the meta-



186 analysis across the COPDGene and FHS (Figure S2), a higher PGS<sub>BMI</sub> was associated with  
187 increased WAP of subsegmental bronchi ( $\beta=0.17, p=3.6\times 10^{-4}$ ).

188 In COPDGene, the PGS<sub>BMI</sub> was associated with previously identified emphysema- and airway-  
189 predominant disease axes, and imaging subtypes (Table S8 and S9). A higher PGS<sub>BMI</sub> was  
190 associated with a higher baseline lung volume-adjusted lung density; however, there was no  
191 significant association between the PGS<sub>BMI</sub> and the longitudinal change in lung density (see  
192 details in Supplementary Results).

### 193 Mendelian randomization analyses

194 The IVW MR analyses suggested a significant effect of genetically predicted BMI on perc15 ( $\beta$   
195 per SD increase of BMI=4.66,  $p=8.5\times 10^{-4}$ ), Pi10 ( $\beta=0.026, p=6.8\times 10^{-4}$ ), and WAP-seg ( $\beta=0.80,$   
196  $p=3.1\times 10^{-6}$ ) (Table 3, MR scatterplots in Figures S3-S6). The effect of BMI on perc15 and  
197 WAP-seg remained significant using the weighted median and MR-Egger methods. We did not  
198 detect significant heterogeneity or directional horizontal pleiotropy of the instrumental variants'  
199 effect.

200

## 201 **Discussion**

202 In this multi-cohort analysis of adults from COPD-enriched and population-based cohorts, using  
203 computed tomographic (CT) measures, we found that a polygenic score of BMI (PGS<sub>BMI</sub>) was  
204 associated with quantitative and visual emphysema and airway measures. Consistent with the  
205 findings of measured BMI, the PGS<sub>BMI</sub> was associated with decreased quantitative emphysema  
206 measures, less severe visually assessed emphysema, and decreased risk for emphysema-  
207 predominant disease axis and subtypes. Conversely, it was associated with increased quantitative

208 airway wall thickness (AWT) measures and visual airway wall thickening, as well as a higher  
209 risk for airway-predominant disease axis and subtypes.

210 Automated quantification and visual interpretation of imaging characteristics capture  
211 distinct aspects and pathogenesis of emphysema and airway disease and provide complementary  
212 information on these phenotypes.<sup>24,25</sup> Quantitative measures catch subtle radiodensity differences  
213 beyond visual detection and thus provide high measurement sensitivity. However, it is important  
214 to note that chest wall soft tissues, associated with BMI, could lead to variation in CT beam  
215 attenuation and thus affect the radiodensity of lung structures. In contrast, visual measures  
216 additionally capture morphological features, such as the size, type, and distribution of low  
217 attenuation areas, and can differentiate emphysematous lesions from other imaging  
218 abnormalities. Thus, visually assessed emphysema may be less susceptible to the BMI-related  
219 artifact compared to quantitative emphysema measures. Restrictive effects of BMI on the lungs  
220 may lead to variation in inspiration at CT scanning and affect airway lumen diameters. However,  
221 the association between the  $PGS_{BMI}$  and AWT measures remained when CT lung volume was  
222 additionally adjusted. Despite the potential biases introduced by BMI-related artifacts, these  
223 approaches helped to enhance the validity of our findings. Further studies using histological  
224 measures of emphysema and AWT may be warranted to confirm our findings; however, such  
225 studies are likely limited to a small sample size.

226 An association between low BMI and emphysema has been well described. However,  
227 cachexia is a well-known phenomenon in advanced COPD. Thus, whether low BMI itself is a  
228 risk factor for emphysema is not known. A previous study among participants with COPD have  
229 demonstrated associations of the *FTO* (fat mass and obesity-associated) gene-associated variants  
230 with BMI and emphysema;<sup>11</sup> however whether these findings hold true for a set of BMI-related

231 variants, for additional imaging phenotypes and in larger cohorts, is not known. Our finding of  
232 an inverse association between the PGS<sub>BMI</sub> and emphysema suggests that a genetic  
233 predisposition to lower BMI is a risk factor for emphysema. BMI polygenic scores derived from  
234 GWASs of adult BMI explain BMI variation in early childhood,<sup>27</sup> indicating that adult BMI-  
235 related genetic variants could exert effects on affected traits in a person's early life. In humans,  
236 the number of alveoli increases substantially during the first two years of life and continues to  
237 increase at a slower rate until adolescence.<sup>28</sup> Individuals with larger lungs have been shown to  
238 have lower lung density compared to those with smaller lungs, with implications of  
239 anthropometric traits affecting alveolar growth and structure.<sup>29</sup> Recent studies showed that genes  
240 regulating organ size (e.g., skeletomuscular development) were enriched in lung development,<sup>30</sup>  
241 and were shared between BMI and lung function.<sup>31</sup> In extreme conditions, relatively young  
242 individuals who died of starvation or were severely malnourished demonstrated evidence of  
243 emphysema.<sup>32,33</sup> Similarly, in mouse studies, calorie restriction resulted in alveolar loss and gas-  
244 exchange unit enlargement, consistent with histological emphysema, whereas subsequent  
245 refeeding led to alveolar regeneration.<sup>34</sup> It was thus hypothesized that adaptive tissue  
246 degeneration of alveoli could occur in response to calorie restriction and decreased oxygen  
247 consumption. Biologic pathways that are activated in the setting of reduced calorie intake may be  
248 related to genetic variants leading to low BMI. An analysis of ECLIPSE showed that in people  
249 with COPD, emphysema was associated with low BMI and multi-organ extrapulmonary tissue  
250 loss, indicating a phenotype characterized by a defect in tissue repair and maintenance.<sup>35</sup> The  
251 role of BMI-related genetics and related biological pathways in alveolar tissue growth,  
252 maintenance, and repair remains to be elucidated.

253           In contrast to emphysema, our finding of an association of a higher PGS<sub>BMI</sub> with  
254 increased AWT implies a possible causal effect of obesity on bronchial wall thickening. Obesity  
255 is associated with systemic inflammation which affects multiple organs. In adults with asthma,  
256 obesity was associated with airway inflammation characterized by elevated bronchial  
257 submucosal eosinophils and sputum interleukin-5.<sup>36</sup> In addition to the effect of circulating  
258 inflammatory cytokines released by remote adipocytes, adipose tissue within the airway wall  
259 may play a role in airway inflammation. Of note, a recent study of post-mortem lungs showed  
260 that adipose tissue was present in large airways, and was positively associated with BMI, number  
261 of inflammatory cells in the airway, and histological AWT.<sup>37</sup> In animal studies, adipose cells  
262 were found in the airways of porcine lungs and functioned as a local source of inflammatory  
263 adipokines in the airway.<sup>38</sup> Another study showed that obese adipocytes promoted inflammation  
264 of airway epithelial cells which was attenuated by weight loss in mice.<sup>39</sup> Our findings raise the  
265 possibility that modification of BMI may affect airway disease among obese individuals, which  
266 needs to be further examined in clinical trials.

267           We used a PGS as the primary exposure given a higher phenotypic variance explained  
268 compared to an individual genetic variant. A PGS, comprising genetic variants fixed at  
269 conception, along with Mendelian randomization (MR) analyses, can provide support for  
270 causality.<sup>12</sup> We studied variants identified from very large studies of BMI in population-based  
271 cohorts (not enriched for COPD or emphysema) and used MR methods that are robust to some  
272 forms of pleiotropy. However, we acknowledge that statements of causality in genetics can be  
273 complicated by effects that may occur outside the studied exposure and pleiotropy. It is worth  
274 noting that the effect size estimates from the PGS and the MR analyses are not directly

275 comparable because the exposure variables are on different scales. Nonetheless, the primary goal  
276 of this study was not to quantify but to identify causal effects.

277 Additional limitations of the study include that different CT imaging protocols, data  
278 processing software, and visual emphysema scoring methods were utilized among study cohorts,  
279 which inevitably introduced heterogeneity and noise in the imaging measures. However, we still  
280 found significant results when combining estimates across cohorts using random-effects meta-  
281 analysis. BMI is a crude measure of adiposity and does not distinguish between the relative  
282 content or distribution of bone, muscle, or adipose tissue (i.e., body composition). Our  $PGS_{BMI}$   
283 was derived from BMI GWASs using predominantly general population cohorts with European  
284 ancestry. This precluded our ability to examine the effect of variants of non-European ancestry,  
285 of rare allele frequency, or in a specific disease state. FHS contributed approximately 1% to the  
286 sample populations of the BMI GWAS where our  $PGS_{BMI}$  was derived, which may result in  
287 overfitting of the  $PGS_{BMI}$  in FHS participants. MESA had a considerable variant drop-out which  
288 may explain the relatively lower performance of the  $PGS_{BMI}$  among MESA cohorts. Our  $PGS_{BMI}$   
289 did not perform as well in the African Americans as in the non-Hispanic white participants,  
290 which is consistent with the known issue of low portability of PGSs across ancestry.<sup>40</sup> The PGS  
291 portability issue is thought primarily stemming from different linkage disequilibrium patterns  
292 and allele frequencies between populations, and highlights the importance of conducting multi-  
293 ancestry GWASs and constructing multi-ancestry PGSs in the future. Further, Chinese and  
294 Hispanic participants were only present in MESA with a relatively small sample size. The  
295 generalizability of our results to individuals of non-European ancestry needs to be confirmed.

296 To conclude, a higher BMI polygenic score is associated with decreased emphysema and  
297 increased airway wall thickness among persons with and without COPD. Our data suggest that

298 genetic factors related to BMI also influence emphysema and airway disease, indicating potential  
299 shared genetic underpinnings of anthropometric and adiposity traits with COPD phenotypes.  
300 Future studies integrating genetics of body composition traits beyond BMI, as well as multi-  
301 omics data from blood and lung sources, are likely needed to further unravel the biological  
302 pathways underlying these associations. This exploration may lead to the discovery of novel  
303 clinical markers and potential druggable targets.

## 304 References

- 305 1. Castaldi PJ, Dy J, Ross J, et al. Cluster analysis in the COPDGene study identifies subtypes  
306 of smokers with distinct patterns of airway disease and emphysema. *Thorax* 2014; **69**(5): 415-  
307 22.
- 308 2. Kinney GL, Santorico SA, Young KA, et al. Identification of Chronic Obstructive  
309 Pulmonary Disease Axes That Predict All-Cause Mortality: The COPDGene Study. *Am J Epidemiol*  
310 2018; **187**(10): 2109-16.
- 311 3. Johannessen A, Skorge TD, Bottai M, et al. Mortality by level of emphysema and airway  
312 wall thickness. *Am J Respir Crit Care Med* 2013; **187**(6): 602-8.
- 313 4. Oelsner EC, Carr JJ, Enright PL, et al. Per cent emphysema is associated with respiratory  
314 and lung cancer mortality in the general population: a cohort study. *Thorax* 2016; **71**(7): 624-32.
- 315 5. Oelsner EC, Smith BM, Hoffman EA, et al. Prognostic Significance of Large Airway  
316 Dimensions on Computed Tomography in the General Population. The Multi-Ethnic Study of  
317 Atherosclerosis (MESA) Lung Study. *Ann Am Thorac Soc* 2018; **15**(6): 718-27.
- 318 6. Blue bloater: pink puffer. *Br Med J* 1968; **2**(5606): 677.
- 319 7. Rutten EP, Grydeland TB, Pillai SG, et al. Quantitative CT: Associations between  
320 Emphysema, Airway Wall Thickness and Body Composition in COPD. *Pulm Med* 2011; **2011**:  
321 419328.
- 322 8. Ogawa E, Nakano Y, Ohara T, et al. Body mass index in male patients with COPD:  
323 correlation with low attenuation areas on CT. *Thorax* 2009; **64**(1): 20-5.
- 324 9. Locke AE, Kahali B, Berndt SI, et al. Genetic studies of body mass index yield new insights  
325 for obesity biology. *Nature* 2015; **518**(7538): 197-206.
- 326 10. Yengo L, Sidorenko J, Kemper KE, et al. Meta-analysis of genome-wide association  
327 studies for height and body mass index in approximately 700000 individuals of European  
328 ancestry. *Hum Mol Genet* 2018; **27**(20): 3641-9.
- 329 11. Wan ES, Cho MH, Boutaoui N, et al. Genome-wide association analysis of body mass in  
330 chronic obstructive pulmonary disease. *Am J Respir Cell Mol Biol* 2011; **45**(2): 304-10.
- 331 12. Richardson TG, Harrison S, Hemani G, Davey Smith G. An atlas of polygenic risk score  
332 associations to highlight putative causal relationships across the human phenome. *Elife* 2019; **8**.
- 333 13. Regan EA, Hokanson JE, Murphy JR, et al. Genetic epidemiology of COPD (COPDGene)  
334 study design. *COPD* 2010; **7**(1): 32-43.
- 335 14. Vestbo J, Anderson W, Coxson HO, et al. Evaluation of COPD Longitudinally to Identify  
336 Predictive Surrogate End-points (ECLIPSE). *Eur Respir J* 2008; **31**(4): 869-73.
- 337 15. Weinmann GG, Chiang YP, Sheingold S. The National Emphysema Treatment Trial  
338 (NETT): a study in agency collaboration. *Proc Am Thorac Soc* 2008; **5**(4): 381-4.
- 339 16. Zhu G, Warren L, Aponte J, et al. The SERPINE2 gene is associated with chronic  
340 obstructive pulmonary disease in two large populations. *Am J Respir Crit Care Med* 2007;  
341 **176**(2): 167-73.
- 342 17. Kannel WB, Feinleib M, McNamara PM, Garrison RJ, Castelli WP. An investigation of  
343 coronary heart disease in families. The Framingham offspring study. *Am J Epidemiol* 1979;  
344 **110**(3): 281-90.

- 345 18. Splansky GL, Corey D, Yang Q, et al. The Third Generation Cohort of the National Heart,  
346 Lung, and Blood Institute's Framingham Heart Study: design, recruitment, and initial  
347 examination. *Am J Epidemiol* 2007; **165**(11): 1328-35.
- 348 19. Bild DE, Bluemke DA, Burke GL, et al. Multi-Ethnic Study of Atherosclerosis: objectives  
349 and design. *Am J Epidemiol* 2002; **156**(9): 871-81.
- 350 20. Zhang J, Moll M, Hobbs BD, et al. Genetically Predicted Body Mass Index and Mortality  
351 in COPD. *Am J Respir Crit Care Med* 2024.
- 352 21. Bhatt SP, Washko GR, Hoffman EA, et al. Imaging Advances in Chronic Obstructive  
353 Pulmonary Disease. Insights from the Genetic Epidemiology of Chronic Obstructive Pulmonary  
354 Disease (COPDGene) Study. *Am J Respir Crit Care Med* 2019; **199**(3): 286-301.
- 355 22. Lynch DA, Austin JH, Hogg JC, et al. CT-Definable Subtypes of Chronic Obstructive  
356 Pulmonary Disease: A Statement of the Fleischner Society. *Radiology* 2015; **277**(1): 192-205.
- 357 23. Grydeland TB, Dirksen A, Coxson HO, et al. Quantitative computed tomography  
358 measures of emphysema and airway wall thickness are related to respiratory symptoms. *Am J*  
359 *Respir Crit Care Med* 2010; **181**(4): 353-9.
- 360 24. Halper-Stromberg E, Cho MH, Wilson C, et al. Visual Assessment of Chest Computed  
361 Tomographic Images Is Independently Useful for Genetic Association Analysis in Studies of  
362 Chronic Obstructive Pulmonary Disease. *Ann Am Thorac Soc* 2017; **14**(1): 33-40.
- 363 25. Park J, Hobbs BD, Crapo JD, et al. Subtyping COPD by Using Visual and Quantitative CT  
364 Imaging Features. *Chest* 2020; **157**(1): 47-60.
- 365 26. Cho MH, Castaldi PJ, Hersh CP, et al. A Genome-Wide Association Study of Emphysema  
366 and Airway Quantitative Imaging Phenotypes. *Am J Respir Crit Care Med* 2015; **192**(5): 559-69.
- 367 27. Khera AV, Chaffin M, Wade KH, et al. Polygenic Prediction of Weight and Obesity  
368 Trajectories from Birth to Adulthood. *Cell* 2019; **177**(3): 587-96 e9.
- 369 28. Herring MJ, Putney LF, Wyatt G, Finkbeiner WE, Hyde DM. Growth of alveoli during  
370 postnatal development in humans based on stereological estimation. *Am J Physiol Lung Cell Mol*  
371 *Physiol* 2014; **307**(4): L338-44.
- 372 29. Robert HB, Robert AW, Kirk G, Drummond MB, Mitzner W. Lung density changes with  
373 growth and inflation. *Chest* 2015; **148**(4): 995-1002.
- 374 30. Portas L, Pereira M, Shaheen SO, et al. Lung Development Genes and Adult Lung  
375 Function. *Am J Respir Crit Care Med* 2020; **202**(6): 853-65.
- 376 31. Zhu Z, Li J, Si J, et al. A large-scale genome-wide association analysis of lung function in  
377 the Chinese population identifies novel loci and highlights shared genetic aetiology with  
378 obesity. *Eur Respir J* 2021; **58**(4).
- 379 32. Coxson HO, Chan IH, Mayo JR, Hlynsky J, Nakano Y, Birmingham CL. Early emphysema in  
380 patients with anorexia nervosa. *Am J Respir Crit Care Med* 2004; **170**(7): 748-52.
- 381 33. Stein J, Fenigstein H. Pathological anatomy of hunger disease. In: Winick M, ed. Hunger  
382 disease: studies by the Jewish physicians in the Warsaw Ghetto: current concepts in nutrition.  
383 New York: John Wiley & Sons; 1979: 207-29.
- 384 34. Massaro D, Massaro GD, Baras A, Hoffman EP, Clerch LB. Calorie-related rapid onset of  
385 alveolar loss, regeneration, and changes in mouse lung gene expression. *Am J Physiol Lung Cell*  
386 *Mol Physiol* 2004; **286**(5): L896-906.
- 387 35. Celli BR, Locantore N, Tal-Singer R, et al. Emphysema and extrapulmonary tissue loss in  
388 COPD: a multi-organ loss of tissue phenotype. *Eur Respir J* 2018; **51**(2).



- 389 36. Scott HA, Ng SH, McLoughlin RF, et al. Effect of obesity on airway and systemic  
390 inflammation in adults with asthma: a systematic review and meta-analysis. *Thorax* 2023.
- 391 37. Elliot JG, Donovan GM, Wang KCW, Green FHY, James AL, Noble PB. Fatty airways:  
392 implications for obstructive disease. *Eur Respir J* 2019; **54**(6).
- 393 38. Wang CJ, Noble PB, Elliot JG, Choi YS, James AL, Wang KCW. Distribution, composition,  
394 and activity of airway-associated adipose tissue in the porcine lung. *Am J Physiol Lung Cell Mol*  
395 *Physiol* 2023; **324**(2): L179-L89.
- 396 39. Ather JL, Van Der Vliet KE, Mank MM, Reed LF, Dixon AE, Poynter ME. Obese adipose  
397 tissue modulates proinflammatory responses of mouse airway epithelial cells. *Am J Physiol*  
398 *Regul Integr Comp Physiol* 2021; **321**(1): R79-R90.
- 399 40. Duncan L, Shen H, Gelaye B, et al. Analysis of polygenic risk score usage and  
400 performance in diverse human populations. *Nat Commun* 2019; **10**(1): 3328.
- 401

Table 1. Baseline characteristics of participants in each cohort (n=16,349).

| Variable                     | COPDGene NHW (n=5604) | COPDGene AA (n=1793) | ECLIPSE (n=1596) | NETT (n=374)  | GenKOLS (n=774) | FHS (n=3167)  | MESA NHW (n=1190) | MESA AA (n=802) | MESA Chinese (n=406) | MESA Hispanic (n=643) |
|------------------------------|-----------------------|----------------------|------------------|---------------|-----------------|---------------|-------------------|-----------------|----------------------|-----------------------|
| Age (year)                   | 62.3 (13.5)           | 53.2 (9.5)           | 64.0 (10.0)      | 68.0 (7.0)    | 59.3 (15.8)     | 49.0 (14.0)   | 70.0 (15.0)       | 69.0 (14.0)     | 68.0 (15.0)          | 67.0 (14.0)           |
| Sex (male)                   | 2934 (52.4%)          | 1032 (57.6%)         | 1046 (65.5%)     | 239 (63.9%)   | 461 (59.6%)     | 1652 (52.2%)  | 589 (49.5%)       | 366 (45.6%)     | 207 (51.0%)          | 307 (47.7%)           |
| Current smoker               | 2167 (38.7%)          | 1420 (79.2%)         | 550 (34.5%)      | 0 (0%)        | 356 (46.0%)     | 254 (8.0%)    | 83 (7.0%)         | 91 (11.3%)      | 14 (3.4%)            | 40 (6.2%)             |
| Ever smoker                  | 100%                  | 100%                 | 100%             | 100%          | 100%            | 1520 (48.0%)  | 721 (60.6%)       | 478 (59.6%)     | 117 (28.8%)          | 330 (51.3%)           |
| Pack-years of smoking *      | 42.0 (28.8)           | 35.3 (24.3)          | 45.0 (27.0)      | 60.8 (40.0)   | 22.3 (20.9)     | 12.0 (20.3)   | 16.5 (29.5)       | 13.0 (26.6)     | 8.5 (21.0)           | 6.3 (16.7)            |
| BMI (kg/m <sup>2</sup> )     | 27.9 (7.5)            | 27.8 (8.4)           | 26.2 (6.8)       | 25.0 (5.0)    | 25.5 (5.3)      | 27.0 (6.4)    | 27.1 (6.5)        | 29.5 (7.4)      | 23.9 (4.2)           | 28.8 (6.4)            |
| FEV <sub>1</sub> % predicted | 77.9 (38.1)           | 88.9 (32.6)          | 46.3 (24.1)      | 28.0 (10.0)   | 76.1 (40.1)     | 97.9 (17.4)   | 93.5 (22.1)       | 93.7 (24.8)     | 94.3 (21.1)          | 101.9 (23.5)          |
| FEV <sub>1</sub> /FVC        | 0.69 (0.24)           | 0.76 (0.19)          | 0.44 (0.17)      | 0.32 (0.09)   | 0.68 (0.26)     | 0.76 (0.09)   | 0.73 (0.10)       | 0.76 (0.11)     | 0.75 (0.09)          | 0.77 (0.09)           |
| %LAA-950                     | 3.1 (8.6)             | 1.2 (3.5)            | 16.5 (18.1)      | 14.8 (16.4)   | 1.8 (8.4)       | 2.1 (2.4)     | 2.0 (3.4)         | 1.3 (2.1)       | 1.5 (2.6)            | 0.8 (1.5)             |
| perc15                       | -924.0 (33.7)         | -907.0 (36.9)        | -953.0 (34.0)    | -949.0 (24.0) | -912.0 (48.3)   | -910.0 (27.8) | -918.5 (26.0)     | -907.9 (31.6)   | -916.6 (26.4)        | -903.5 (33.8)         |
| Pi10                         | 3.66 (0.15)           | 3.69 (0.16)          | 4.39 (0.25)      | 4.55 (0.58)   | 4.82 (0.45)     | 3.64 (0.25)   | 4.27 (0.29)       | 4.19 (0.27)     | 4.18 (0.24)          | 4.26 (0.27)           |
| WAP-seg                      | 61.1 (4.0)            | 61.4 (4.2)           | 65.8 (5.5)       | 73.2 (4.5)    | 75.4 (3.9)      | 52.9 (6.1)    | 61.6 (4.4)        | 61.1 (4.5)      | 62.3 (4.2)           | 61.9 (4.0)            |

Continuous variables are presented with the median (interquartile range). Categorical variables are presented with count (percentage).

\* Among ever-smokers.

COPDGene = Genetic Epidemiology of COPD; ECLIPSE = Evaluation of COPD Longitudinally to Identify Predictive Surrogate Endpoints; NETT = National Emphysema Treatment Trial; GenKOLS = Genetics of Chronic Obstructive Lung Disease; FHS = Framingham Heart Study; MESA = Multi-Ethnic Study of Atherosclerosis; NHW = non-Hispanic white; AA = African American.

BMI = body mass index; FEV<sub>1</sub> = forced expiratory volume in 1s; FVC = forced vital capacity; %LAA-950 = percent of low attenuation area ≤ -950 Hounsfield units; perc15 = the 15<sup>th</sup> percentile of the lung attenuation histogram; Pi10 = the square root of wall area of a 10-mm lumen perimeter airway; WAP-seg = the mean wall area percent of segmental bronchi.

Table 2. Associations of the polygenic score of BMI ( $PGS_{BMI}$ ) with measured BMI ( $kg/m^2$ ) in each study cohort.

| Cohort        | Number of participants | $PGS_{BMI}$                   |                        |                           |
|---------------|------------------------|-------------------------------|------------------------|---------------------------|
|               |                        | Beta (per standard deviation) | P value                | Variance of BMI explained |
| COPDGene NHW  | 5604                   | 1.98                          | $1.4 \times 10^{-141}$ | 10.6%                     |
| COPDGene AA   | 1793                   | 1.19                          | $1.4 \times 10^{-6}$   | 1.2%                      |
| ECLIPSE       | 1596                   | 1.58                          | $2.3 \times 10^{-30}$  | 7.5%                      |
| NETT          | 374                    | 0.90                          | $9.8 \times 10^{-7}$   | 6.3%                      |
| GenKOLS       | 774                    | 1.38                          | $5.2 \times 10^{-20}$  | 9.7%                      |
| FHS           | 3167                   | 2.43                          | $6.4 \times 10^{-168}$ | 21.0%                     |
| MESA NHW      | 1190                   | 1.29                          | $5.3 \times 10^{-15}$  | 4.8%                      |
| MESA AA       | 802                    | 1.01                          | $5.5 \times 10^{-4}$   | 2.1%                      |
| MESA Chinese  | 406                    | 0.72                          | $3.5 \times 10^{-5}$   | 3.9%                      |
| MESA Hispanic | 643                    | 2.46                          | $3.0 \times 10^{-8}$   | 4.4%                      |

COPDGene = Genetic Epidemiology of COPD; ECLIPSE = Evaluation of COPD Longitudinally to Identify Predictive Surrogate Endpoints; NETT = National Emphysema Treatment Trial; GenKOLS = Genetics of Chronic Obstructive Lung Disease; FHS = Framingham Heart Study; MESA = Multi-Ethnic Study of Atherosclerosis; NHW = non-Hispanic white; AA = African American; BMI = body mass index.

Table 3. Causal effect estimates of BMI on emphysema and airway wall thickness measures.

| Outcome      | MR methods      | Variant number | Effect estimate* | p-value              |
|--------------|-----------------|----------------|------------------|----------------------|
| Log-%LAA-950 | IVW             | 321            | -0.079           | 0.26                 |
| perc15       | IVW             | 321            | 4.66             | $8.5 \times 10^{-4}$ |
|              | Weighted median | 321            | 5.71             | 0.0090               |
|              | MR-Egger        | 321            | 10.63            | 0.0025               |
| Pi10         | IVW             | 321            | 0.026            | $6.8 \times 10^{-4}$ |
|              | Weighted median | 321            | 0.026            | 0.034                |
|              | MR-Egger        | 321            | 0.019            | 0.31                 |
| WAP-seg      | IVW             | 321            | 0.80             | $3.1 \times 10^{-6}$ |
|              | Weighted median | 321            | 0.89             | 0.0014               |
|              | MR-Egger        | 321            | 1.20             | 0.0061               |

\* Effect estimate was based on per one standard deviation increase of BMI.

BMI = body mass index; MR = Mendelian randomization; IVW = inverse variance weighted; log-%LAA-950 = log transformed percent of low attenuation area  $\leq$  -950 Hounsfield units; perc15 = the 15th percentile of the lung attenuation histogram; Pi10 = the square root of wall area of a 10-mm lumen perimeter airway; WAP-seg = the mean wall area percent of segmental bronchi.

### Log-%LAA-950

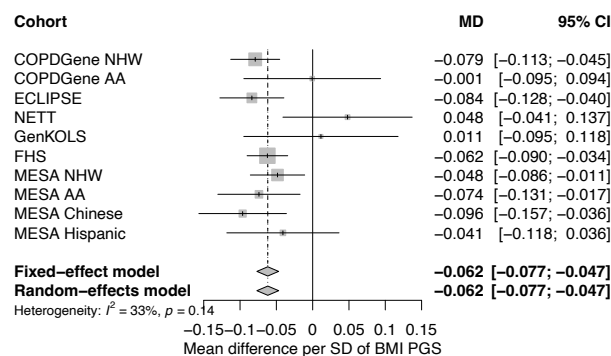

### Perc15

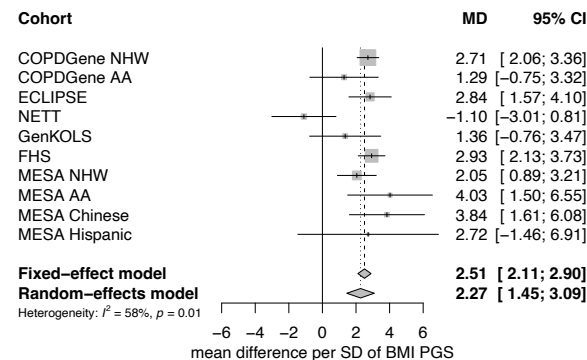

### Visual emphysema

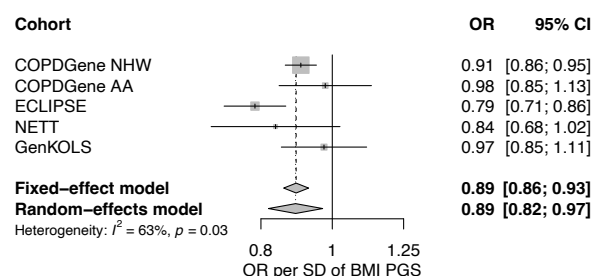

### Pi10

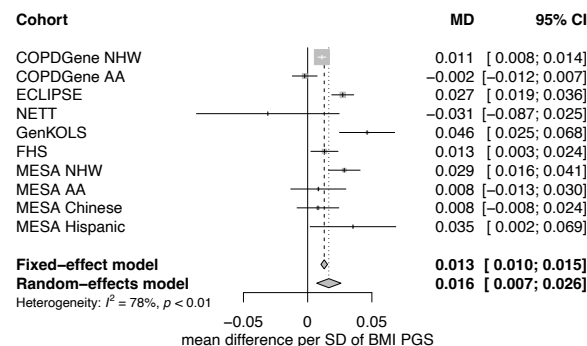

### WAP-seg

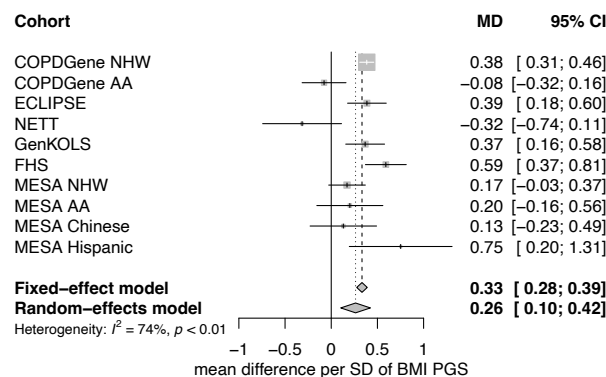

Figure 1. Associations of the body mass index (BMI) polygenic score (PGS) with computed tomographic emphysema and airway wall thickness measures among study cohorts. %LAA-950 = percent of low attenuation area  $\leq$  -950 Hounsfield units; Perc15 = the 15<sup>th</sup> percentile of the lung attenuation histogram; Pi10 = the square root of wall area of a 10-mm lumen perimeter airway; WAP-seg = the mean wall area percent of segmental bronchi; MD = mean difference; OR = odds ratio; SD = standard deviation.
